# Supplementary material
Source: MDPI journal article supplement (https://www.mdpi.com/2077-0472/13/2/226)
Supplement: s1 [file s1]

## Supplementary Materials

# Research Progress of Soil and Vegetation Restoration Technology in Open-Pit Coal Mine: A Review

Daolong Xu <sup>1</sup>, Xiufen Li <sup>2</sup>, Jian Chen <sup>1</sup> and Jianghua Li <sup>1,\*</sup>

<sup>1</sup> National Engineering Laboratory for Cereal Fermentation Technology, Jiangnan University, 1800 Lihu Rd, Wuxi 214122, China

<sup>2</sup> School of Environment and Civil Engineering, Jiangnan University, Wuxi 214122, China

\* Correspondence: lijiahua@jiangnan.edu.cn; Tel./Fax: +0510-85329031

Supporting Information Includes:

2 Table

1 Figure

### Table Captions:

**Table S1** Microbial characteristics of the coal mine spoil [30].

**Table S2** Differences in plant and arbuscular mycorrhizal fungal (AMF) variables in response to the addition of seeds or soil inoculum and their interaction. Degrees of freedom (df), F-statistics and p values are reported. Significance at 0.001\*\*\*, 0.01\*\* and 0.05\* levels shown. Ns- not significant. The results of generalized linear models with the addition of seeds and soil inoculum as fixed effects are shown [97].

### Figure Captions:

**Figure S1** Requirements for plant growth experiments and determination of optimal scenarios [58].

**Table S1** Microbial characteristics of the coal mine spoil [30].

| Microbial groups (CFU/g) | Barren (control)  | After 1 year      | After 3 year      | After 3 year      |
|--------------------------|-------------------|-------------------|-------------------|-------------------|
| Bacteria                 | $1.8 \times 10^1$ | $4.3 \times 10^4$ | $6.6 \times 10^6$ | $9.8 \times 10^7$ |
| Fungi                    | $6.6 \times 10^1$ | $3.2 \times 10^4$ | $4.4 \times 10^5$ | $7.5 \times 10^6$ |
| Actinomycetes            | Nil               | $8.4 \times 10^4$ | $8.9 \times 10^5$ | $6.5 \times 10^5$ |
| Rhizobium                | Nil               | $5.1 \times 10^4$ | $7.6 \times 10^6$ | $7.2 \times 10^6$ |
| Azotobacter              | Nil               | $3.6 \times 10^5$ | $8.6 \times 10^6$ | $8.7 \times 10^6$ |

**Table S2** Differences in plant and arbuscular mycorrhizal fungal (AMF) variables in response to the addition of seeds or soil inoculum and their interaction. Degrees of freedom (df), F-statistics and p values are reported. Significance at 0.001\*\*\*, 0.01\*\* and 0.05\* levels shown. Ns- not significant. The results of generalized linear models with the addition of seeds and soil inoculum as fixed effects are shown [97].

| Factor                               | Response variable    | 1st year |        |    | 2nd year |        |     |
|--------------------------------------|----------------------|----------|--------|----|----------|--------|-----|
|                                      |                      | df       | F      | p  | df       | F      | p   |
| + <i>Inoculum</i>                    | Plant richness       | 1        | 0.975  | ns | 1        | 23.367 | *** |
|                                      | Plant cover          | 1        | 0.877  | ns | 1        | 7.206  | *   |
|                                      | Plant extrapolated   | 1        | 1.917  | ns | 1        | 8.818  | *   |
|                                      | asymptotic Shannon   |          |        |    |          |        |     |
|                                      | entropy              |          |        |    |          |        |     |
|                                      | AMF richness         | 1        | 4.002  | ns | 1        | 12.858 | *** |
|                                      | AMF reads per sample | 1        | 0.0277 | ns | 1        | 0.011  | ns  |
|                                      | 16:1ω5 NLFA          | 1        | 2.887  | ns | 1        | 44.643 | *** |
|                                      | concentration        |          |        |    |          |        |     |
|                                      | AMF extrapolated     | 1        | 3.217  | ns | 1        | 16.776 | *   |
|                                      | asymptotic Shannon   |          |        |    |          |        |     |
|                                      | entropy              |          |        |    |          |        |     |
| <i>Seeds*Inoculum</i><br>interaction | Plant community      | 1        | 0.905  | ns | 1        | 5.946  | *   |
|                                      | mycorrhization       |          |        |    |          |        |     |
|                                      | Plant richness       | 1        | 1.8429 | ns | 1        | 0.935  | ns  |
|                                      | Plant richness       | 1        | 0.6156 | ns | 1        | 2.387  | ns  |
|                                      | Plant extrapolated   | 1        | 2.57   | ns | 1        | 3.625  | ns  |
|                                      | asymptotic Shannon   |          |        |    |          |        |     |
|                                      | entropy              |          |        |    |          |        |     |
|                                      | AMF richness         | 1        | 7.3716 | ** | 1        | 1.497  | ns  |
|                                      | AMF reads per sample | 1        | 0.7424 | ns | 1        | 2.569  | ns  |
|                                      | 16:1ω5 NLFA          | 1        | 1.312  | ns | 1        | 6.2107 | *   |
|                                      | concentration        |          |        |    |          |        |     |

|                    |   |       |    |   |       |    |
|--------------------|---|-------|----|---|-------|----|
| AMF extrapolated   | 1 | 7.286 | ** | 1 | 0.371 | ns |
| asymptotic Shannon |   |       |    |   |       |    |
| entropy            |   |       |    |   |       |    |
| Plant community    | 1 | 0.16  | ns | 1 | 1.004 | ns |
| mycorrhization     |   |       |    |   |       |    |

---

Notes: Degrees of freedom (df), F-statistics and p values are reported. Significance at 0.001\*\*\*,

0.01\*\* and 0.05\* levels shown. Ns- not significant.

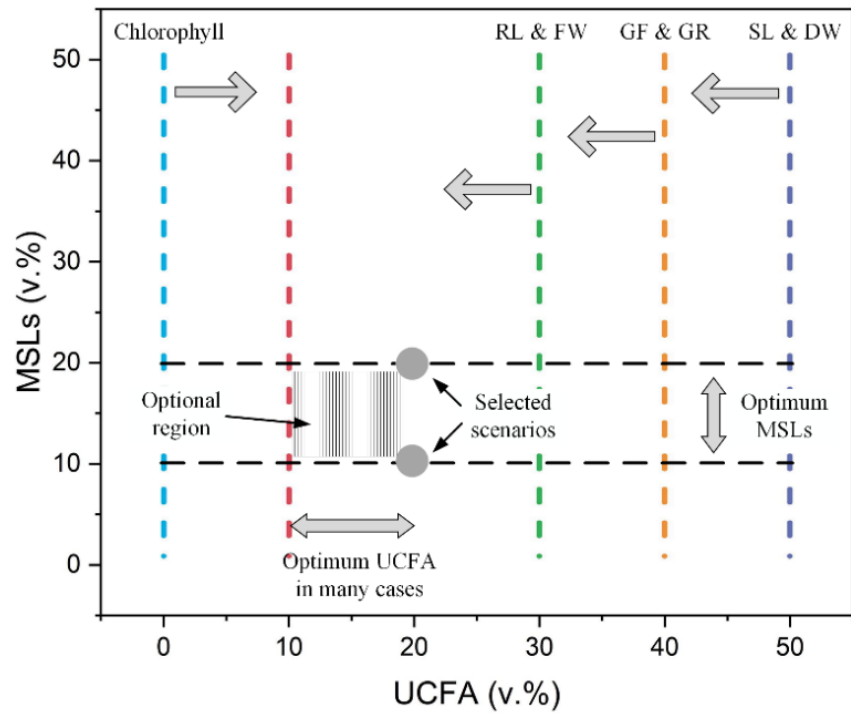

**Figure S1** Requirements for plant growth experiments and determination of optimal scenarios [58].
